# Supplementary material
Source: PubMed Central journal article supplement (PMC2667734)

## **Supplement**

### **Methods**

#### ***Generation of iC3***

iC3 was generated by treating purified C3 with 200 mM methylamine pH 8.0 for 3 hours at 37°C. The solution was then diluted 1:20 in 25 mM Tris pH 8.0 and 5 mM EDTA. The reaction mixture was loaded onto a Mono Q column equilibrated in 20 mM Tris pH 8.0 containing 5 mM EDTA and eluted with a 0.0 - 0.5 M NaCl gradient. The iC3 peak was pooled, concentrated and frozen at -80°C.

#### ***Affinity maturation of YW144.2.45***

To generate the library template for affinity maturation of YW144.2.45, the GCN4 leucine zipper of the parental phagemid was removed using Kunkel mutagenesis to provide a monovalent display Fab format. Three stop codons were incorporated in CDR-L3. A soft randomization strategy was used for affinity maturation, which introduced a mutation rate of approximately 50% at selected positions by using a poisoned oligonucleotide strategy with 70-10-10-10 mixtures of bases favoring the wild type nucleotides. Three different libraries were constructed based on combinations of CDR loops L1/L2/L3, L3/H1/H2 and L3/H3. Mutations were generated at positions 28-33 of CDRL1, 50 and 53-55 of CDRL2, 91-94 and 96 of CDRL3, 28-35 of CDRH1, 50-58 of CDR-H2, and 95-100 of CDRH3 (Fig. S1).

For selecting affinity-matured clones, phage libraries were subjected to plate sorting for the first round and followed by four rounds of solution phase sorting as described (1). After the first round of plate panning, four rounds of solution phase sorting were performed to enhance the efficiency of affinity-based selection with increased stringency achieved by decreasing the amount of biotinylated C3b from 10 nM to 0.5 nM and by adding non-biotinylated C3b as competitor during round 4 through 6.

After six rounds of panning, a high throughput single-point competitive phage ELISA was used to rapidly screen for high affinity clones as described (2). Clones were selected for further analysis based on the ratio of binding affinity in the presence or absence of 1 nM C3b.

### ***Surface Plasmon Resonance***

The anti-C3 antibody (S77) was amine coupled to a Biacore CM5 chip and blocked with ethanolamine. Complement proteins were individually tested at varying concentrations in HBS-P buffer (0.01 M HEPES, pH 7.4/0.15 M NaCl/0.005% Surfactant P20). All SPR analyses were performed at 25°C by using a flow rate of 20 µl/min. Sensorgrams were run in order from low to high concentration and in duplicate. All sensor chips were regenerated, without loss of activity, by using two injections (30 seconds) of 10 mM glycine, pH 1.5. Analysis of the binding curves and determination of K<sub>d</sub> values were done using evaluation software (version 4.1; Biacore).

### ***Generation of CR1 LHRAC***

Long Homologous Repeat (LHR) A and C of CR1 were generated by PCR amplification of a CR1 splice variant lacking LHR B (Origene Technologies). The PCR fragment was subcloned in a pRK vector containing a (6) His at the N-terminus. CHO cells were transiently transfected with the plasmid, and CR1 LHRAC was isolated using a nickel affinity column. The protein was further purified by ion-exchange chromatography and dialyzed against PBS buffer.

### ***C3b ELISA for testing specificity of anti C3b antibody S77 IgG***

To determine the selectivity of S77 and the concentration of S77-reactive C3 proteins in serum, S77 IgG was used as a capture antibody. To determine the concentration of total C3 proteins, a polyclonal antibody to C3 (C3 pAb, Cappel, Solon, OH, Cat. 55033) reactive with all C3 proteins was used as a capture antibody. Capture antibody was diluted in PBS to 2 µg/mL and added to wells of a 384-well MaxiSorp plate (Nunc). After a blocking step (PBS/0.5% BSA), C3b (Complement Technology, Inc.) or human plasma samples were diluted at a minimum dilution of 1:300, serial 1:4 in sample buffer (PBS, pH 7.4/0.5% BSA/0.05% Tween 20/0.2% bovine gamma globulin/0.25% CHAPS/5 mM EDTA/15ppm Proclin) and added to the plates. Plasma was obtained with informed consent from the donors. Following a 2 hr incubation, detection antibody (HRP-conjugated goat F(ab')<sub>2</sub> anti-human C3 (Protos Immunoresearch, Burlingame, CA, Cat. 765) diluted 1:7,000 in assay buffer (PBS/0.5% BSA/0.05% Tween-20) was added, and the plates were incubated for a final 2 hr. Color was then developed for 10 min using tetramethyl

benzidine (KPL, Gaithersburg, MD), and the reaction was stopped by adding 25  $\mu$ l/well 1.0 M phosphoric acid. The absorbance was read at 450 and 630 nm wavelength.

#### ***Factor B, factor H, and CR1 binding assays***

384-well MaxiSorp plates were coated overnight at 4°C with 3  $\mu$ g/ml C3b in PBS (20  $\mu$ l/well) prepared as described previously (3). The plates were washed 6 times with 100  $\mu$ l PBS 0.1% Tween (PBST) (BioTek EL405 washer) and blocked for 2 hrs at RT with 4% BSA / 0.05% Tween / PBS (PBST). S77 or control Fab was added for 30 minutes at room temperature with shaking. CR1 (LHRAC, 50 nM), fH (0.33  $\mu$ M), and fB (1  $\mu$ M) were added to wells for 1 hr then washed 6x with PBST. To detect bound proteins, 2  $\mu$ g/ml monoclonal anti-CD35 (CR1, BD), 2  $\mu$ g/ml monoclonal anti-factor H (Quidel, San Diego), 1:5000 polyclonal-anti-factor B (Kent Labs, Bellingham, WA) in PBST were added to respective wells for 30 minutes then washed 6x PBST. Wells were subsequently incubated for 30 min with 1:7000 donkey-anti-mouse IgG (H+L) or -anti-goat IgG (H+L) HRPO (Jackson, West Grove, PA) then washed 9 x with PBST. Reaction was developed with 20  $\mu$ l TMB substrate (BD) and stopped with 10  $\mu$ l 2 N sulfuric acid. Plates were read at 450 nm.

#### ***Properdin binding assay***

384-well MaxiSorp plates were coated overnight at 4°C with 10  $\mu$ g/ml factor P (CompTech) in PBS (20  $\mu$ l/well). The plates were washed 6 times with 100  $\mu$ l PBS 0.1% Tween (PBST) (BioTek EL405 washer) and blocked for 2 hrs at RT with 4% BSA / 0.05% Tween / PBS (PBST). 50 nM C3b plus increasing concentrations of S77 or control Fab were mixed for 30 min @room temperature with shaking. Twenty  $\mu$ l C3b/inhibitor mix was added to properdin coated plates for 1 hour @room temperature. Anti-properdin antibody (Quidel #1) was added directly to properdin-coated plate for 30 min then 50 nM C3b was added. Plate was washed 6x with PBST and 20  $\mu$ l 1:5000 anti-C3 HRPO (MP Biomedical) was added for 30 minutes, then washed 6x PBST. Reaction was developed with 20  $\mu$ l TMB substrate (BD) and stopped with 10  $\mu$ l 2N sulfuric acid. Plates were read at 450 nm.

### ***Decay assays***

The microtiter plate assay for the alternative pathway decay accelerating activity was performed as described previously (4) with the following modifications. 384-well Maxisorp plates were coated overnight at 4°C with 20 µl of 3 µg/ml C3b in PBS. Plates were washed 6 times in PBST and blocked for 2 hrs at room temperature with PBST containing 4% BSA. Plates were incubated for 1 hr at room temperature with 400 ng/ml of factor B and 25 ng/ml of factor D in AP convertase buffer (veronal buffer (BioWhittaker), 0.15 mM CaCl<sub>2</sub>, 2 mM NiCl<sub>2</sub>, 25 mM NaCl, 0.05% Tween 20 and 4% BSA), and washed 3x in PBST, followed by incubation for 15 min with either S77, control Fab or CR1 in AP convertase buffer, then washed 6x with PBST. To determine the effect of S77 on convertase formation, increasing concentrations of S77 or control Fab was added and incubated for 30 minutes. Next, factor B and factor D diluted in AP convertase buffer was added and incubated for 1 hr followed by washing 6 times with PBST. Factor Bb was detected with sequential 30 minute incubations of 1:5,000 dilution of goat anti-human factor B polyclonal antibody (Kent) in AP and 1:7,000 dilution of donkey anti-goat antibody conjugated to HRPO (Jackson) in AP convertase buffer. Color was developed with TMB substrate (BD), stopped in 2N H<sub>2</sub>SO<sub>4</sub> and absorbance read at 450 nm.

### ***Factor H and CRI co-factor gel assay***

All dilutions were made in 0.1% gelatin veronal buffer containing 0.15 mM CaCl<sub>2</sub> 1 mM MgCl<sub>2</sub>. 0.4 µM C3b plus increasing concentrations of S77 or control Fab were incubated for 20 minutes at room temperature. Then 20 nM fI and 20 nM fH or 12 nM CR1 were added. The mixture was incubated for 60 min at 37 °C, stopped with Laemmli's buffer (Bio-Rad, Hercules, CA) and the samples visualized on an 8% gel with Simply Blue Safe Stain (Invitrogen, Carlsbad, CA).

### ***C3 convertase assays***

The effect of S77 on fluid phase C3 convertase activity was determined by incubating 0.067 µM purified C3 with increasing concentrations of S77 or control Fab in GVB (veronal buffer [BioWhittaker]/0.5% bovine skin gelatin [Sigma]) at room temperature for 10 min. Thereafter, 0.4 µM each factor B and factor D were added in the presence of 33 mM MgEGTA in a total volume of 75 µl to activate

the pathway. After a 10 min incubation at room temperature, C3a produced in the reaction mixtures was converted to the inactive C3a des Arg by the addition of rabbit serum (25  $\mu$ l, diluted 1:2 with GVB), followed by the addition of 0.25 M EDTA (100  $\mu$ L). C3a des Arg was measured by an ELISA in which anti-C3a/C3a des Arg (Abcam) was used as the capture antibody and biotinylated anti-C3a (Fitzgerald) was used as the detection antibody.

For analysis of C3 convertase activity by gel-electrophoresis, 0.4  $\mu$ M purified C3 and S77 or control Fab were incubated for 20 minutes at room temperature in PBST/0.15 mM CaCl<sub>2</sub>/1 mM MgCl<sub>2</sub>. 0.4  $\mu$ M factor B and 0.04  $\mu$ M factor D were added and incubated for 30 minutes at 37°C. The reaction was stopped by adding Laemmli's sample buffer containing 2-mercaptoethanol, boiled for 3 min, and electrophoresed on an 8% SDS-PAGE gel (Invitrogen). Proteins were visualized by staining the gel with Simply Blue (Invitrogen). The difference in IC<sub>50</sub> of S77 Fab inhibition of fluid-phase C3 convertase using the ELISA versus gel electrophoresis can be explained by the differences in C3 concentrations used in each assay.

### ***C5 convertase assay***

C5 convertase was assembled on zymosan particles (CompTech) according to Rawal and Pangburn (5) with the following modifications. Activated zymosan particles (CompTech) were washed in 1x GVB (0.1% gelatin veronal buffer). 10<sup>10</sup> zymosan particles, 2 mg purified C3 and 5  $\mu$ g trypsin in 200  $\mu$ l GVB were incubated for 10 minutes at 22° C, repeating the C3-trypsin step. Zymosan-C3b was washed 6x in GVB, resuspended in 100  $\mu$ l GVB, and 50  $\mu$ l containing 35  $\mu$ g factor B and 0.5  $\mu$ g factor D plus 50  $\mu$ l of 10 mM NiCl<sub>2</sub> were added and incubated for 5 minutes at 22°C, washed in GVB and repeated 3x.

Convertase activity was determined by adding C5 to zymosan-C3b as follows. C5 was preincubated for 20 minutes at 37°C to eliminate any C5b,6 activity. A 25  $\mu$ l reaction mix in siliconized tubes containing 5  $\mu$ M C5, 258 nM factor B, 167 nM factor D, 833 nM C6, 0.5 mM NiCl<sub>2</sub>, increasing concentrations of S77 or control Fab and 2x10<sup>6</sup> zymosan-C3b was incubated for 15 minutes at 37°C. Reaction was stopped with 200  $\mu$ l ice cold GVB-10 mM EDTA (GVBE). C5 convertase activity was measured by C5b,6-mediated lysis of chicken erythrocytes (Ec). 25  $\mu$ l aliquot of C5 convertase reaction was added to 1x10<sup>7</sup> Ec and 500  $\mu$ l human serum in 225 GVBE on ice, transferred to 37°C water bath and

incubated for 10 minutes. Unlysed Ec were pelleted for 1 minute at 10,000 x g and 200 ul supernatant was read at 414 nm for Ec lysis.

### ***C5 binding assay***

To determine whether S77 blocked C5 binding to C3b, 3 µg/ml C3b in PBS was coated in 384-well Maxisorp plates overnight at 4°C then washed 6x in TBST (20 mM Tris pH7.5, 150 mM NaCl, 0.05% Tween-20) and blocked in TBST plus 4% BSA for 2 hours at room temperature. S77 or control Fab plus 400 nM C5 (CompTech) were added in TBST containing 20 mM CaCl<sub>2</sub>, 20 mM MgCl<sub>2</sub>, and 1% BSA for 1 hour at room temperature and washed 6x in TBST. Bound C5 was detected with 2 µg/ml monoclonal anti-human C5 (clone 7D12, Genentech) incubated for 30 minutes, washed 6 times, and incubated with 1:5000 anti-mouse IgG HRPO (Jackson) for 30 minutes at room temperature. After washing 6 times with TBST, reaction was developed with TMB (KPL) and stopped with 2 N H<sub>2</sub>SO<sub>4</sub>.

### ***Hemolysis assays***

To determine the effect of S77 on alternative pathway activity, rabbit erythrocytes (Er, Colorado Serum) were washed 3x in GVB and resuspended to 2 x 10<sup>9</sup>/ml. Increasing concentrations of S77 or control Fab (50 µl) were mixed with 20 µl of the Er suspension which was diluted 1:1 with GVB/0.1M EGTA/0.1M MgCl<sub>2</sub> (GVB<sup>++</sup>) just prior to addition. Complement activation was initiated by the addition of C1q-depleted human serum (Quidel; 30 µl diluted 1:3 in GVB). After a 30 minute incubation at room temperature, 200 µl GVB/10 mM EDTA were added to stop the reaction and samples were centrifuged for 5 min at 500 g. Hemolysis was determined in 200 µl supernatant by measuring absorbance at 412 nm. Data were expressed as % of hemolysis induced in the absence of the inhibitor. To determine the effect of CRiG on the classical pathway of complement, a similar procedure was followed except that Er were replaced with IgM-coated sheep erythrocytes (E-IgM, Complement Technologies) and the assay was performed in factor B deficient human serum in GVB<sup>++</sup>. Anti C5 antibody, generated by immunizing mice with human C5 and which block cleavage of C5, were used as a positive control in the classical pathway hemolytic assay.

## References

1. Lee, C. V., Liang, W. C., Dennis, M. S., Eigenbrot, C., Sidhu, S. S., and Fuh, G. (2004) *J Mol Biol* **340**(5), 1073-1093
2. Sidhu, S. S., Lowman, H. B., Cunningham, B. C., and Wells, J. A. (2000) *Methods Enzymol* **328**, 333-363
3. Helmy, K. Y., Katschke, K. J., Jr., Gorgani, N. N., Kljavin, N. M., Elliott, J. M., Diehl, L., Scales, S. J., Ghilardi, N., and van Lookeren Campagne, M. (2006) *Cell* **124**(5), 915-927
4. Hourcade, D. E., Mitchell, L., Kuttner-Kondo, L. A., Atkinson, J. P., and Medof, M. E. (2002) *J Biol Chem* **277**(2), 1107-1112
5. Rawal, N., and Pangburn, M. K. (1998) *J Biol Chem* **273**(27), 16828-16835
6. Wu, T. T., and Kabat, E. A. (1970) *J Exp Med* **132**(2), 211-250
7. Oran, A. E., and Isenman, D. E. (1999) *J Biol Chem* **274**(8), 5120-5130

## Supplemental Figures

Fig. S1. Alignment of the light-chain (LC) and heavy-chain (HC) variable region amino acid residues of the naïve (YW144.2.45) and affinity matured (YW144.2.45.S77 or S77) phage antibodies. Orange indicated the amino acid substitutions introduced for affinity maturation of S77. Boxes indicate CDR sequences by Kabat definition (6).

**Fig. S2A. Alignment of human and rhesus (*Macaca mulatta*) C3.** Indicated in green are residues in the beta chain that are in contact with S77. Purple highlights indicate residues in the alpha chain that are in contact with S77. Arrow indicates amino acid substitution in Rhesus (*Macaca Mulatta*) C3 (H898F) crucial for S77 binding to C3b.

**Fig. S2B. Complex of S77 with C3b.**

S77 is depicted as a molecular surface, heavy chain in yellow and the light chain in grey. The main chain of C3b is depicted as a grey ribbon. Residues important for CR1 cofactor activity and fH binding (7) are color coded as indicated in Fig. S2A.

**Fig. S3. S77 does not affect binding of properdin to C3b.**

fP was coated on microwell plates followed by addition of C3b with increasing concentrations of S77 or a

fP blocking antibody. Binding of C3b to fP was determined with an HRPO-conjugated anti C3 polyclonal antibody. Data are expressed as mean  $\pm$  SD of triplicate measurements.

**Supplemental Table 1: Data collection and refinement statistics**

|                                                |                                              |
|------------------------------------------------|----------------------------------------------|
| <b>Data collection</b>                         | C3b/S77 Fab complex                          |
| Space group                                    | C2                                           |
| Cell parameters                                | a=216.4, b=180.4,<br>c=154.6, $\beta$ =115.7 |
| Resolution (Å)                                 | 50-3.1                                       |
| R <sub>sym</sub> <sup>b</sup>                  | 0.135 (0.667)                                |
| Number of observations                         | 379428                                       |
| Unique reflections                             | 101495                                       |
| Completeness (%)                               | 100.0 (100.0)                                |
| <b>Refinement</b>                              |                                              |
| Content of asymmetric unit                     | 2 C3b/S77-Fab complexes                      |
| Resolution (Å)                                 | 20-3.1                                       |
| Number of reflections                          | 91568                                        |
| Final R <sub>c</sub> , R <sub>free</sub> (F>0) | 0.21.7, 0.283                                |
| Number of residues                             | 3959                                         |
| Number of non-H atoms                          | 31007                                        |
| Rmsd bonds (Å)                                 | 0.007                                        |
| Rmsd angles (°)                                | 1.1                                          |

<sup>a</sup>

Numbers in parentheses refer to the highest resolution shell.

<sup>b</sup>

$R_{sym} = \sum |I - \langle I \rangle| / \sum I$ .  $\langle I \rangle$  is the average intensity of symmetry related observations of a unique reflection.

<sup>c</sup>

$R = \sum |F_o - F_c| / \sum F_o$ . R<sub>free</sub> is calculated as R, but for 5 % of the reflections excluded from all refinement.



# LC

Kabat# 1 2 3 4 5 6 7 8 9 10 11 12 13 14 15 16 17 18 19 20 21 22 23 24 25 26 27 28 29 30 31 32 33 34 35 36 37  
Kabab - CDR L1

YW144.2.45 D I Q M T Q S P S S L S A S V G D R V T I T C R A S Q D V S T A V A W Y Q  
YW144.2.45.S77 D I Q M T Q S P S S L S A S V G D R V T I T C R A S Q D V S T A V A W Y Q

Kabat# 38 39 40 41 42 43 44 45 46 47 48 49 50 51 52 53 54 55 56 57 58 59 60 61 62 63 64 65 66 67 68 69 70 71 72 73 74  
Kabab - CDR L2

YW144.2.45 Q K P G K A P K L L I Y S A S F L Y S G V P S R F S G S G S G T D F T L T  
YW144.2.45.S77 Q K P G K A P K L L I Y S A S F L Y S G V P S R F S G S G S G T D F T L T

Kabat# 75 76 77 78 79 80 81 82 83 84 85 86 87 88 89 90 91 92 93 94 95 96 97 98 99 100 101 102 103 104 105 106 107 108  
Kabab - CDR L3

YW144.2.45 I S S L Q P E D F A T Y Y C Q Q S Y T T P P T F G Q G T K V E I K R  
YW144.2.45.S77 I S S L Q P E D F A T Y Y C Q Q S Y A T L P T F E Q G T K V E I K R

# HC

Kabat# 1 2 3 4 5 6 7 8 9 10 11 12 13 14 15 16 17 18 19 20 21 22 23 24 25 26 27 28 29 30 31 32 33 34 35  
Kabab - CDR H1

YW144.2.45 E V Q L V E S G G G L V Q P G G S L R L S C A A S G F T F S S S S I S  
YW144.2.45.S77 E V Q L V E S G G G L V Q P G G S L R L S C A A S G F S F T S S S V S

Kabat# 41 42 43 44 45 46 47 48 49 50 51 52 A 53 54 55 56 57 58 59 60 61 62 63 64 65 66 67 68 69 70 71 72 73 74  
Kabab - CDR H2

YW144.2.45 P G K G L E W V G I I Y P Y D G S T Y Y A D S V K G R F T I S A D T S  
YW144.2.45.S77 P G K G L E W V G L I Y P Y N G F N Y Y A D S V K G R F T I S A D T S

Kabat# 80 81 82 A B C 83 84 85 86 87 88 89 90 91 92 93 94 95 96 97 98 99 100 A B C D E F 101 102 103 104 105  
Kabab - CDR H3

YW144.2.45 L Q M N S L R A E D T A V Y Y C A R N A L Y G S G G Y Y A M D Y W G Q  
YW144.2.45.S77 L Q M N S L R A E D T A V Y Y C A R N A L Y G S G G Y Y A M D Y W G Q

520 530 540 550 560 570  
 CO3\_HUMAN GQREVVADSVWVDVKDSCVGS<sup>1</sup>LVVKS<sup>2</sup>SGQSE<sup>3</sup>DRQ<sup>4</sup>VP<sup>5</sup>PGQ<sup>6</sup>QMTL<sup>7</sup>KIEGDHG<sup>8</sup>AR<sup>9</sup>VVLVA<sup>10</sup>VDK<sup>11</sup>G  
 CO3\_MACACAM GQREVVADSVWVDVKDSCVGS<sup>1</sup>LVVKS<sup>2</sup>SGQSE<sup>3</sup>DRQ<sup>4</sup>LP<sup>5</sup>PGQ<sup>6</sup>QMTL<sup>7</sup>KIEGDHG<sup>8</sup>AR<sup>9</sup>VGLVA<sup>10</sup>VDK<sup>11</sup>G  
 \*\*\*\*\*  
 MG5 MG6

580 590 600 610 620 630  
 CO3\_HUMAN VFVLNKK<sup>1</sup>NKLT<sup>2</sup>QSKI<sup>3</sup>W<sup>4</sup>DVVE<sup>5</sup>KADIG<sup>6</sup>CTPG<sup>7</sup>SG<sup>8</sup>KDYAG<sup>9</sup>VFSD<sup>10</sup>AGLTF<sup>11</sup>TSS<sup>12</sup>SG<sup>13</sup>QQT<sup>14</sup>AQRAEL<sup>15</sup>Q  
 CO3\_MACACAM VFVLNKK<sup>1</sup>NKLT<sup>2</sup>QSKI<sup>3</sup>W<sup>4</sup>DVVE<sup>5</sup>KADIG<sup>6</sup>CTPG<sup>7</sup>SG<sup>8</sup>KDYAG<sup>9</sup>VFSD<sup>10</sup>AGLTF<sup>11</sup>ASS<sup>12</sup>SG<sup>13</sup>QQT<sup>14</sup>AQRAEL<sup>15</sup>Q  
 \*\*\*\*\*  
 LNK

640 650 660 670 680 690  
 CO3\_HUMAN CPQPAARRRR<sup>1</sup>SVQLTE<sup>2</sup>KRMD<sup>3</sup>KV<sup>4</sup>GKYP<sup>5</sup>KELR<sup>6</sup>KCCEDGMREN<sup>7</sup>PMRF<sup>8</sup>SCQR<sup>9</sup>RRTR<sup>10</sup>FI<sup>11</sup>SLGEACK  
 CO3\_MACACAM CPQPATRRRR<sup>1</sup>SVQLAE<sup>2</sup>KRMD<sup>3</sup>KV<sup>4</sup>GQYP<sup>5</sup>KELR<sup>6</sup>KCCEHGMREN<sup>7</sup>PMRF<sup>8</sup>SCQR<sup>9</sup>RRTRY<sup>10</sup>ITLDEACK  
 \*\*\*\*\* \* \*\*\*\*\*  
 ANA

700 710 720 730 740 750  
 CO3\_HUMAN K<sup>1</sup>VF<sup>2</sup>LDCC<sup>3</sup>NYITELRR<sup>4</sup>QHARASHL<sup>5</sup>GLAR<sup>6</sup>SNLDE<sup>7</sup>DI<sup>8</sup>IAEENI<sup>9</sup>VS<sup>10</sup>RS<sup>11</sup>EF<sup>12</sup>PESW<sup>13</sup>LWN<sup>14</sup>VEDL<sup>15</sup>KEP  
 CO3\_MACACAM K<sup>1</sup>AF<sup>2</sup>LDCC<sup>3</sup>NYITELRR<sup>4</sup>QHARASHL<sup>5</sup>GLAR<sup>6</sup>SNLDE<sup>7</sup>DI<sup>8</sup>IAEENI<sup>9</sup>VS<sup>10</sup>RS<sup>11</sup>EF<sup>12</sup>PESW<sup>13</sup>LWKIEEL<sup>14</sup>KEA  
 \* \*\*\*\*\* \* \*\*\*\*\* \* \*\*\*\*\*  
 ANA α'NT MG6

760 770 780 790 800 810  
 CO3\_HUMAN P<sup>1</sup>KNGIST<sup>2</sup>KLMNIF<sup>3</sup>LKDSIT<sup>4</sup>TWEILAV<sup>5</sup>SMSD<sup>6</sup>KK<sup>7</sup>GICVAD<sup>8</sup>PF<sup>9</sup>EVTVM<sup>10</sup>QDFF<sup>11</sup>IDLRL<sup>12</sup>PYSV<sup>13</sup>VVR  
 CO3\_MACACAM P<sup>1</sup>KNGIST<sup>2</sup>KLMNIF<sup>3</sup>LKDSIT<sup>4</sup>TWEILAV<sup>5</sup>SLSD<sup>6</sup>KK<sup>7</sup>GICVAD<sup>8</sup>PF<sup>9</sup>EVTVM<sup>10</sup>QDFF<sup>11</sup>IDLRL<sup>12</sup>PYSV<sup>13</sup>VVR  
 \*\*\*\*\*  
 MG6 MG7

820 830 840 850 860 870  
 CO3\_HUMAN NEQVEIRAV<sup>1</sup>LYNY<sup>2</sup>R<sup>3</sup>Q<sup>4</sup>N<sup>5</sup>Q<sup>6</sup>ELK<sup>7</sup>KVRV<sup>8</sup>ELLH<sup>9</sup>NP<sup>10</sup>AF<sup>11</sup>CS<sup>12</sup>LAT<sup>13</sup>T<sup>14</sup>KRR<sup>15</sup>H<sup>16</sup>QQT<sup>17</sup>VTI<sup>18</sup>PI<sup>19</sup>PK<sup>20</sup>S<sup>21</sup>SL<sup>22</sup>SV<sup>23</sup>PY<sup>24</sup>VI  
 CO3\_MACACAM NEQVEIRAV<sup>1</sup>LYNY<sup>2</sup>R<sup>3</sup>Q<sup>4</sup>N<sup>5</sup>Q<sup>6</sup>ELK<sup>7</sup>KVRV<sup>8</sup>ELLH<sup>9</sup>NP<sup>10</sup>AF<sup>11</sup>CS<sup>12</sup>LATA<sup>13</sup>KRR<sup>14</sup>H<sup>15</sup>QQT<sup>16</sup>VTI<sup>17</sup>PI<sup>18</sup>PK<sup>19</sup>S<sup>20</sup>SL<sup>21</sup>SV<sup>22</sup>PY<sup>23</sup>VI  
 \*\*\*\*\*  
 MG7

880 890 900 910  
 CO3\_HUMAN V<sup>1</sup>PLKTGL<sup>2</sup>Q<sup>3</sup>EVE<sup>4</sup>VKA<sup>5</sup>AVY<sup>6</sup>HH<sup>7</sup>FI<sup>8</sup>SDG<sup>9</sup>VRK<sup>10</sup>SL<sup>11</sup>KV<sup>12</sup>VPE  
 CO3\_MACACAM V<sup>1</sup>PLKTGQ<sup>2</sup>Q<sup>3</sup>EVE<sup>4</sup>VKA<sup>5</sup>AVY<sup>6</sup>HH<sup>7</sup>FI<sup>8</sup>SDG<sup>9</sup>VRK<sup>10</sup>SL<sup>11</sup>KV<sup>12</sup>--  
 \*\*\*\*\*

- Important for binding fH to C3H<sub>2</sub>O
- Important for CR1 cofactor activity for the first 2 fl-mediated cleavages
- Important for CR1 cofactor activity for the third fl-mediated cleavages

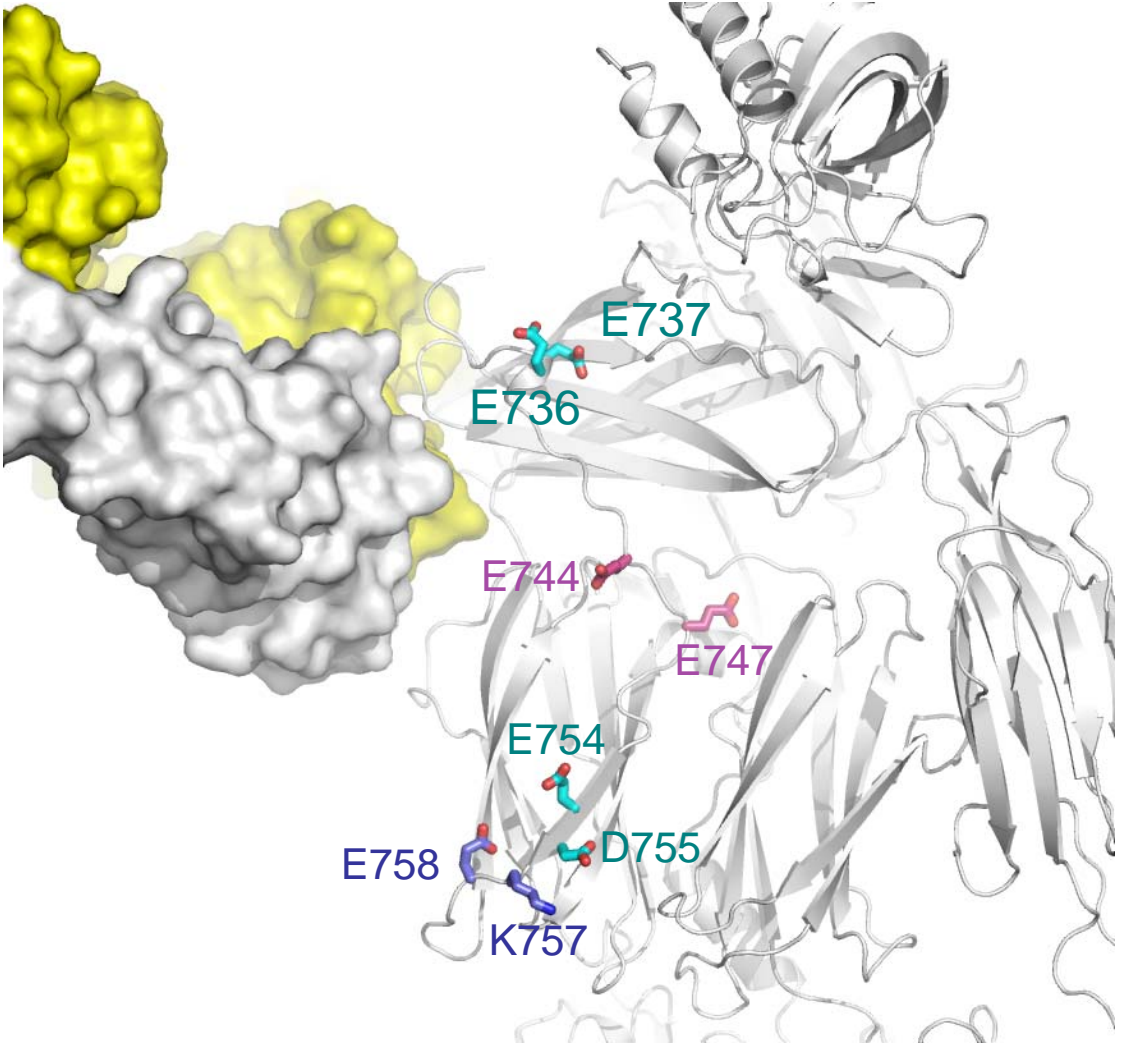

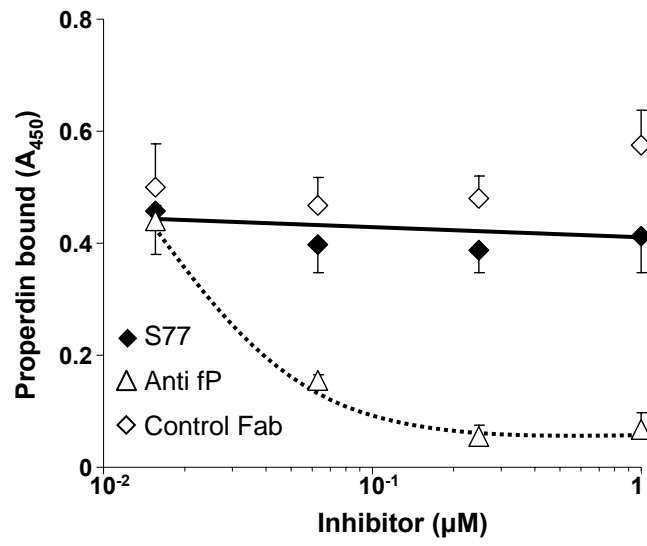

Supplement: M809106200_1.pdf [file M809106200_1.pdf]
